# Supplementary material for: MicroRNA-138-5p Suppresses Non-small Cell Lung Cancer Cells by Targeting PD-L1/PD-1 to Regulate Tumor Microenvironment
Source: PubMed Central journal article supplement (PMC7365935; doi:10.3389/fcell.2020.00540), 2020-07-10
Supplement: Image_1.pdf [file Image_1.pdf]

**MicroRNA-138 suppresses non-small cell lung cancer cells by targeting PD-L1/PD-1 to regulate tumor microenvironment and inhibit the growth of cancer cells**

Nannan Song<sup>1\*</sup>, Peng Li<sup>1\*</sup>, Pingping Song<sup>2</sup>, Yintao Li<sup>2</sup>, Shuping Zhou<sup>1</sup>, Qinghong Su<sup>1</sup>, Xiaofan Li<sup>1</sup>, Yong Yu<sup>1</sup>, Pengfei Li<sup>3</sup>, Meng Feng<sup>1</sup>, Zhang Min<sup>3</sup>, Wei Lin<sup>1\*#</sup>

1 Institute of Basic Medicine, Shandong Provincial Hospital Affiliated to Shandong First Medical University; Shandong First Medical University & Shandong Academy of Medical School, Jinan, 250062, China

2 Department of oncology, Shandong Cancer Hospital and institute, Shandong First Medical University & Shandong Academy of Medical School, Jinan, 250032, China

3 Departments of Medicine, Tibet Nationalities University, Xian City, 712082, China

\*co-first author

**# Correspondence:**

Wei Lin, Ph.D.

Institute of Basic Medicine, Shandong Academy of Medical Sciences,

18877# Jingshi Road, Jinan, Shandong province, China, 250032,

Phone:(+86)-0531-82979938,

linw1978@163.com or weilin11@fudan.edu.cn

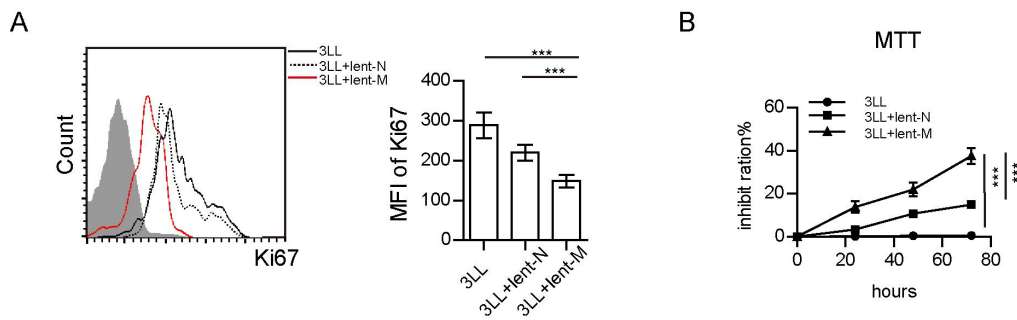

**FIGURE S1 | MiR-138-5p treatment decreases the proliferation of 3LL tumor cells. (A)** Flow cytometry detection Ki67 expression on 3LL cells, with or without lent-M/lent-N treatment. (eight mice per group were assessed; \*\*\*P<0.001). **(B)** After lent-N/lent-M treatment, the inhibit ratio of the proliferation of 3LL cells was analyzed by MTT. (Three independent assays were performed; \*\*\*P<0.001).

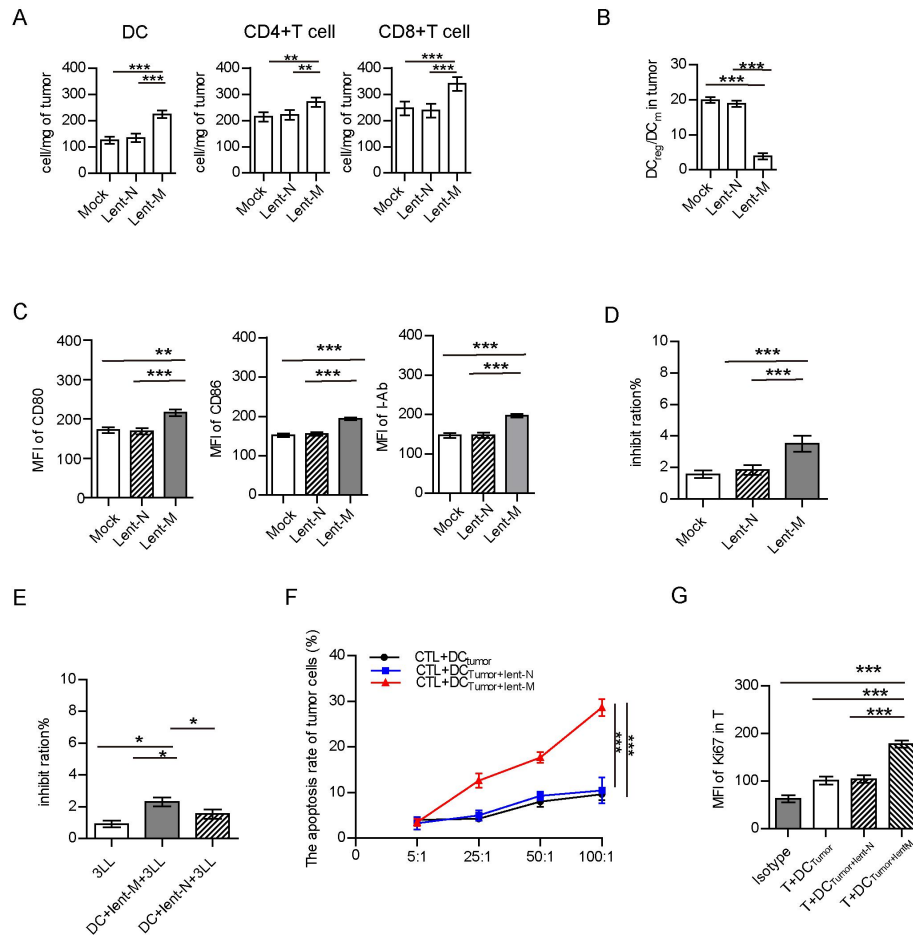

**FIGURE S2 | MiR-138-5p treatment decreases the amounts of tumor infiltrating DCs and T cells from 3LL bearing mice. (A)** The amounts of DCs and CD3<sup>+</sup>CD4<sup>+</sup>T, and CD3<sup>+</sup>CD8<sup>+</sup> T cells were elevated in tumors from lent-miR-138 treated mice compared with the lent-N-treated and untreated groups. **(B)** Ratios of regulator DCs to mature DCs in tumors from mice treated with lent-miR-138 or lent-N or not. **(C)** The mean fluorescence value of CD80, CD86 and I-Ab expression on tumor infiltrating DCs from 3LL bearing mice treated with lent-M or lent-N or not. **(D)** The inhibit ration of tumor infiltrating DCs, which from lent-M, lent-N treated 3LL bearing mice or not (mock), on 3LL cells. **(E)** The inhibit ration of DCs on lent-M, lent-N treated 3LL cells or not. **(F)** Percentages of apoptosis ratio of tumor cells co-cultured with

CD3<sup>+</sup>CD8<sup>+</sup> T cells (CTL) which were activated by DCs pretreated with lent-miR138-5p or lent-NC treated 3LL tumor cells or not. **(G)** Upon lent-miR138-5p or lent-N treatment, the proliferation of CD4<sup>+</sup> T cells was analyzed by flow cytometry detection of Ki67 (Three independent assays were performed; \*P<0.05, \*\*P<0.01, \*\*\*P<0.001).

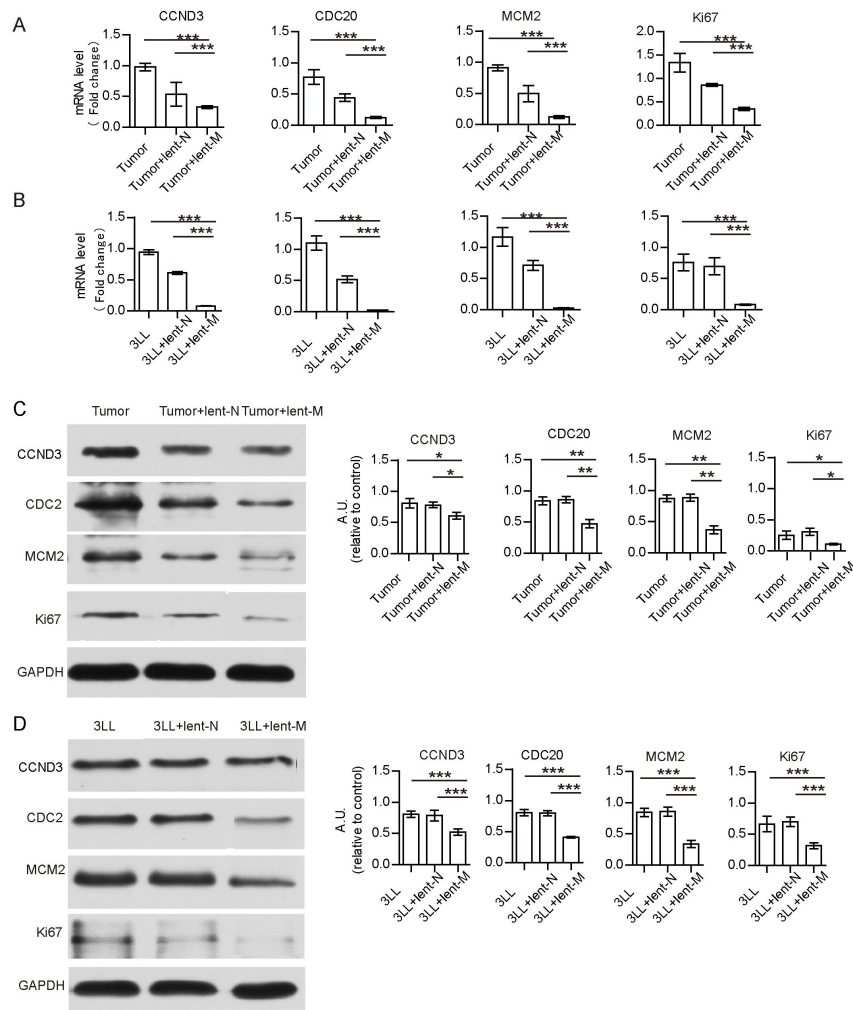

**FIGURE S3 | MiR-138-5p treatment decreases the mRNA and protein expression levels of CCND3, CDC20, MCM2 and Ki67 in 3LL cells bearing mice and 3LL cells.** (A) Lent-miR-138-5p treatment (lent-M) decreased the gene expression levels of CCND3、CDC20、MCM2 and Ki67 in tumors from 3LL bearing mice, compared with the lent-NC treated (lent-N) and non-treated tumors. (B) Decreased gene expression levels of CCND3、CDC20、MCM2 and Ki67 in lent-miR-138-5p treated 3LL cells, lent-NC treated cells and untreated cells. lent-miR-138-5p treatment decreased the protein expression levels of CCND3, CDC20, MCM2 and Ki67 in 3LL tumors (C) or 3LL cells (D). (Three independent assays were performed; \*P<0.05, \*\*P<0.01, \*\*\*P<0.001)

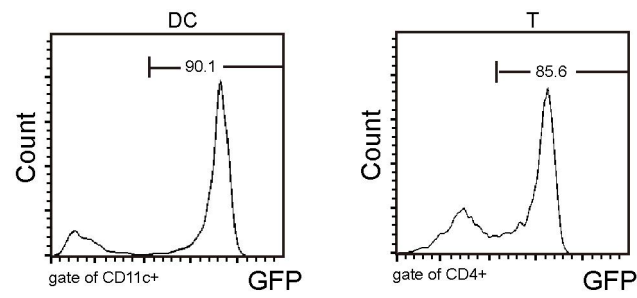

**FIGURE S4 | The transduction efficiency of lent-miR-138-5p-GFP in DCs and T cells.** The proportion of DC or T cells was transduced by lent-miR-138-5p-GFP.

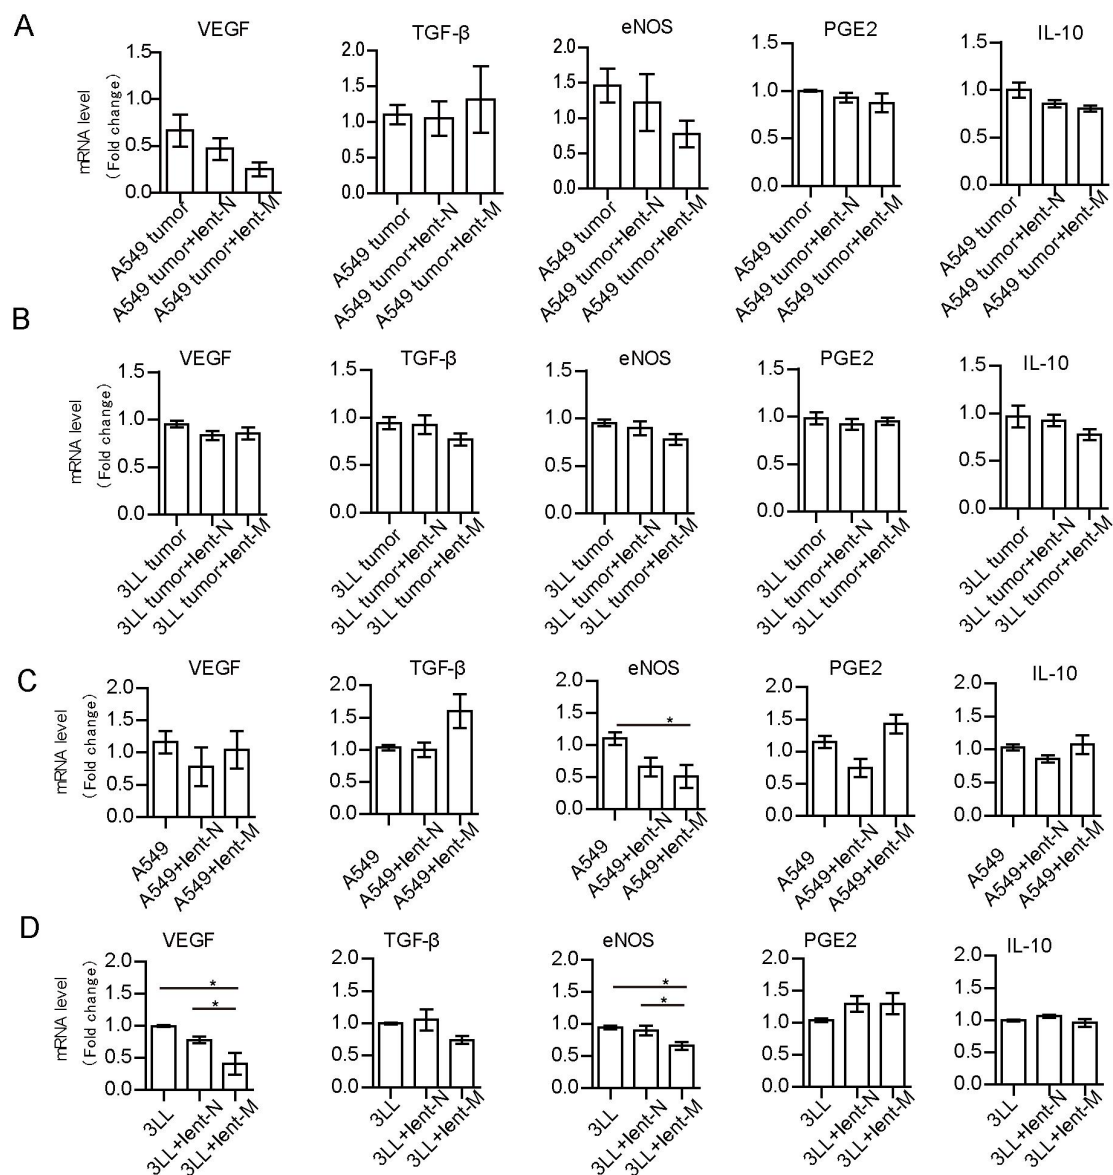

**FIGURE S5 | MiR-138-5p treatment decreases the mRNA expression levels of VEGF, TGF-β, eNOS, PGE2 and IL-10 in A549 tumor (A), 3LL tumor (B), A549 (C) and 3LL cells (D) (Three independent assays were performed; \*P<0.05, \*\*P<0.01, \*\*\*P<0.001).**

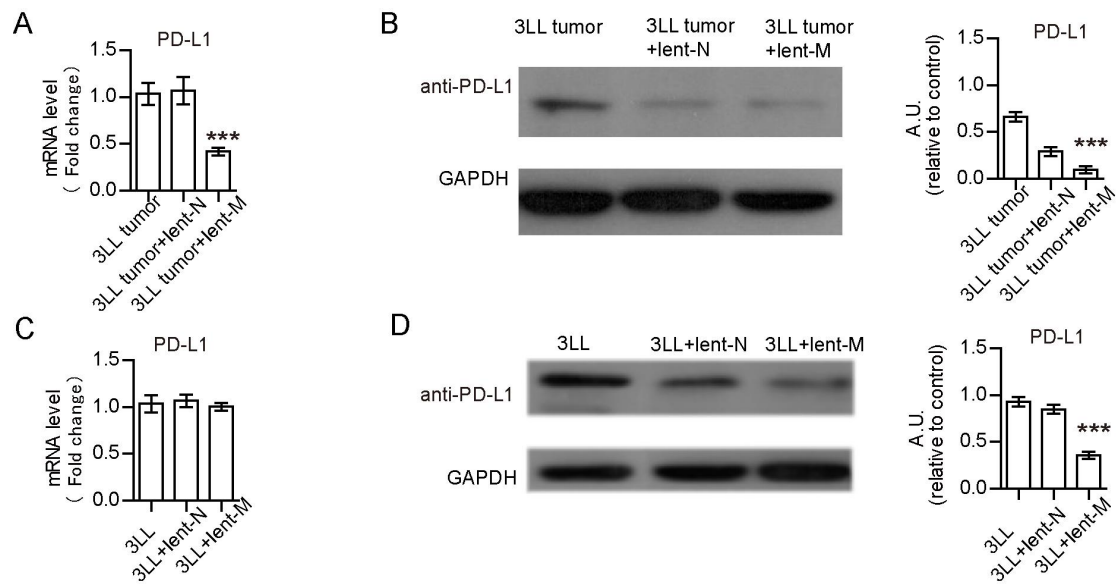

**FIGURE S6 | MiR-138-5p treatment decreases the mRNA and protein expression levels of PD-L1 in 3LL cells.** MiR-138-5p treatment decreases the mRNA (**A**) and protein expression levels (**B**) of PD-L1 in tumor cells from 3LL bearing mice. Lent-miR-138-5p treatment influence the gene expression levels (**C**) and protein level (**D**) of PD-L1 in 3LL cells (Three independent assays were performed; \* $P < 0.05$ , \*\* $P < 0.01$ , \*\*\* $P < 0.001$ ).



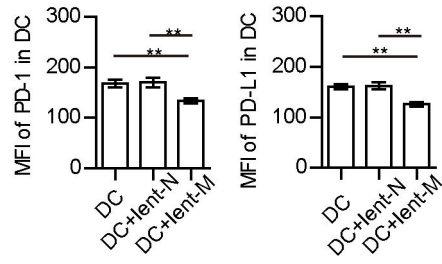

**FIGURE S7 | With lent-miR-138-5p treatment, or lent-N treatment, or not, the level of PD-1 and PD-L1 expression on isolated DCs. (Three independent assays were performed; \*P<0.05, \*\*P<0.01, \*\*\*P<0.001).**

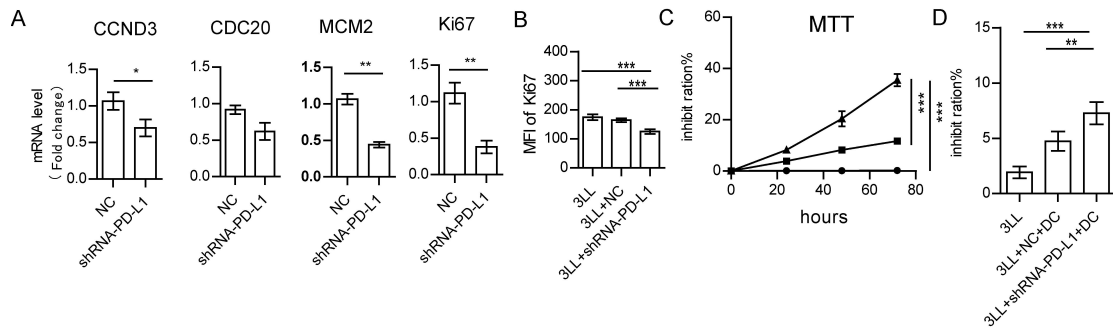

**FIGURE S8 | shRNA PD-L1 influence proliferation of 3LL cell. (A)** shRNA PD-L1 influence the mRNA expression levels of CCND3, CDC20, MCM2 and Ki67 in 3LL cells. With shRNA PD-L1 treatment, the expression of ki67 **(B)** and the inhibit ration of proliferation **(C)** on 3LL cells were measured. **(D)** The killing capability of DC pretreated with shRNA PD-L1 transfected 3LL cells on 3LL cells were analyzed (Three independent assays were performed; \*P<0.05, \*\*P<0.01, \*\*\*P<0.001).

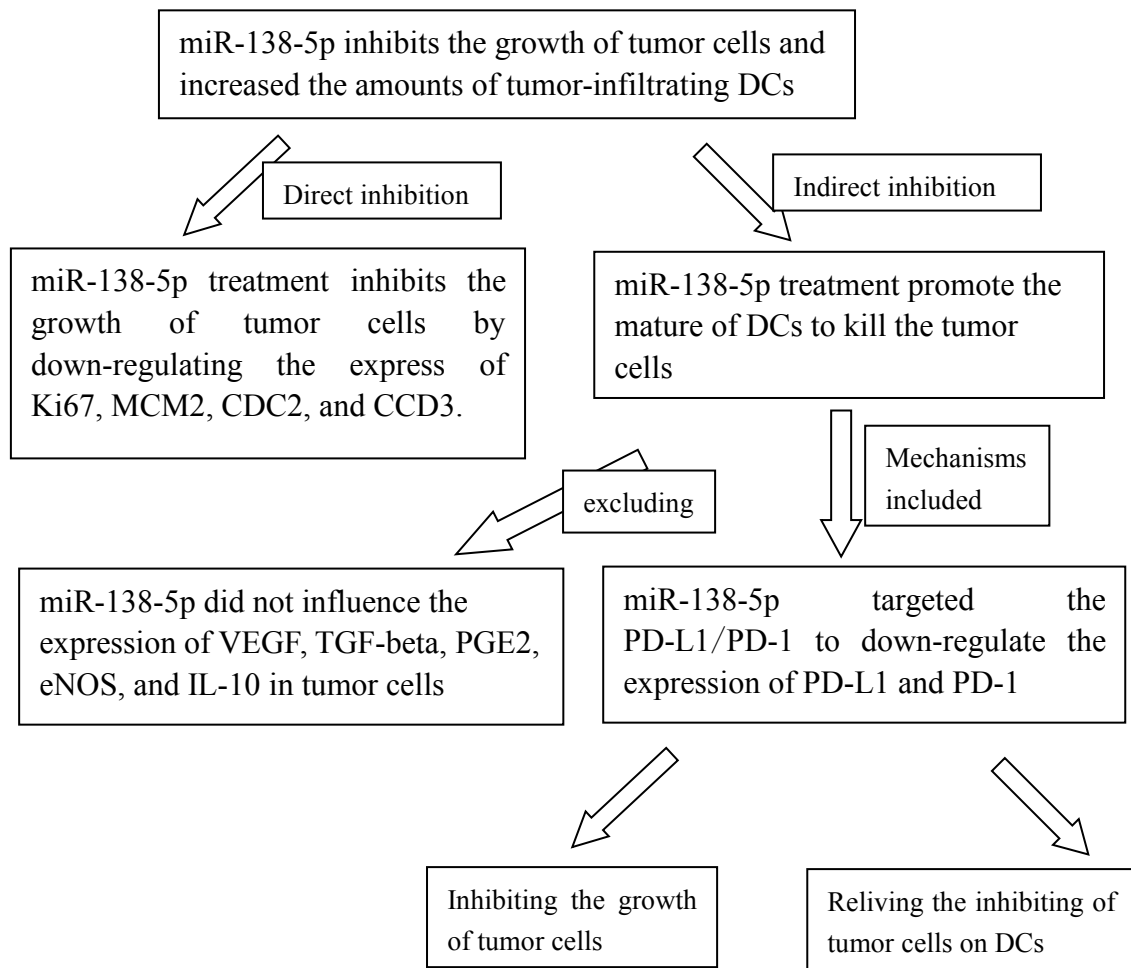

**FIGURE S9 | The research roadmap of our manuscript.** MicroRNA-138-5p suppresses non-small cell lung cancer cells by targeting PD-L1/PD-1 to relieve the inhibition of tumor cells on DCs.

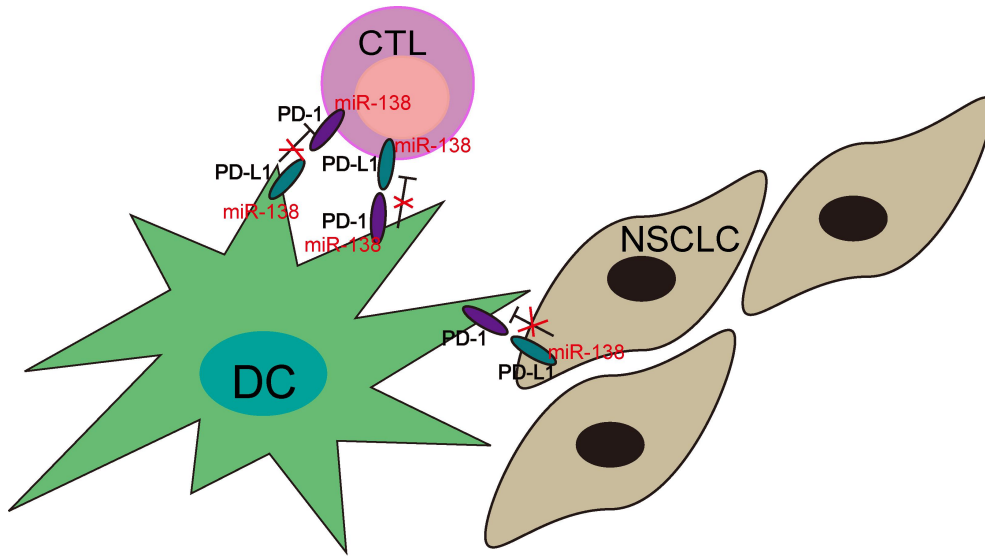

**FIGURE S10 | The diagram of the effect of miR-138 on tumor cells and DCs.** miR-138 downregulated PD-L1/PD-1 to relieve the inhibition of NSCLC cells on DCs, to promote DCs and CTL to kill tumor cells.
