# Supplementary material for: MicroRNA-138-5p Suppresses Non-small Cell Lung Cancer Cells by Targeting PD-L1/PD-1 to Regulate Tumor Microenvironment
Source: PubMed Central journal article supplement (PMC7365935; doi:10.3389/fcell.2020.00540), 2020-07-10
Supplement: Table_1.pdf [file Table_1.pdf]

**MicroRNA-138-5p suppresses non-small cell lung cancer cells by targeting PD-L1/PD-1 to regulate tumor microenvironment and inhibit the growth of cancer cells**

Nannan Song<sup>1\*</sup>, Peng Li<sup>1\*</sup>, Pingping Song<sup>2</sup>, Yintao Li<sup>2</sup>, Shuping Zhou<sup>1</sup>, Qinghong Su<sup>1</sup>, Xiaofan Li<sup>1</sup>, Yong Yu<sup>1</sup>, Pengfei Li<sup>3</sup>, Meng Feng<sup>1</sup>, Zhang Min<sup>3</sup>, Wei Lin<sup>1\*#</sup>

1 Institute of Basic Medicine, Shandong Provincial Hospital Affiliated to Shandong First Medical University; Shandong First Medical University & Shandong Academy of Medical School, Jinan, 250032, China

2 Department of oncology, Shandong Cancer Hospital and institute, Shandong First Medical University & Shandong Academy of Medical School, Jinan, 250032, China

3 Departments of Medicine, Tibet Nationalities University, Xian City, 712082, China

| Symbol  | Fold Change | T-TEST          | Fold Up- or Down-Regulation |
|---------|-------------|-----------------|-----------------------------|
|         | G /A        | p value         | G /A                        |
| ACLY    | 0.98        | N/A             | -1.02                       |
| ACSL4   | 0.79        | N/A             | -1.26                       |
| ADM     | 1.09        | N/A             | 1.09                        |
| ANGPT1  | 0.95        | N/A             | -1.05                       |
| ANGPT2  | 1.27        | N/A             | 1.27                        |
| APAF1   | 1.18        | N/A             | 1.18                        |
| ARNT    | 1.42        | N/A             | 1.42                        |
| ATP5A1  | 0.72        | N/A             | -1.40                       |
| AURKA   | 0.54        | N/A             | -1.86                       |
| BCL2L11 | 1.00        | N/A             | -1.00                       |
| BIRC3   | 0.91        | N/A             | -1.10                       |
| BMI1    | 0.68        | N/A             | -1.47                       |
| CA9     | <b>0.21</b> | <b>&lt;0.01</b> | <b>-4.76</b>                |
| CASP2   | 0.96        | N/A             | -1.04                       |
| CASP7   | 0.89        | N/A             | -1.12                       |
| CASP9   | 0.89        | N/A             | -1.13                       |

|         |              |                  |              |
|---------|--------------|------------------|--------------|
| CCL2    | 1.17         | N/A              | 1.17         |
| CCND2   | 0.75         | N/A              | -1.33        |
| CCND3   | <b>0.46</b>  | <b>&lt;0.05</b>  | <b>-2.17</b> |
| CDC20   | <b>0.42</b>  | <b>&lt;0.05</b>  | <b>-2.37</b> |
| CDH2    | 1.97         | N/A              | 1.97         |
| CFLAR   | 1.72         | N/A              | 1.72         |
| COX5A   | 1.18         | N/A              | 1.18         |
| CPT2    | 0.79         | N/A              | -1.27        |
| DDB2    | 1.02         | N/A              | 1.02         |
| DDIT3   | 0.95         | N/A              | -1.05        |
| DKC1    | <b>0.44</b>  | <b>&lt;0.05</b>  | <b>-2.27</b> |
| DSP     | 0.79         | N/A              | -1.27        |
| E2F4    | 0.92         | N/A              | -1.09        |
| EPO     | <b>4.92</b>  | <b>&lt;0.01</b>  | <b>4.92</b>  |
| ERCC3   | 0.64         | N/A              | -1.57        |
| ERCC5   | 1.36         | N/A              | 1.36         |
| ETS2    | 1.24         | N/A              | 1.24         |
| FASLG   | 0.77         | N/A              | -1.31        |
| FGF2    | 1.16         | N/A              | 1.16         |
| FLT1    | <b>10.01</b> | <b>&lt;0.001</b> | <b>10.01</b> |
| FOXC2   | 1.28         | N/A              | 1.28         |
| G6PD    | 0.72         | N/A              | -1.40        |
| GADD45G | 0.57         | N/A              | -1.77        |
| GPD2    | 0.81         | N/A              | -1.24        |
| GSC     | <b>2.59</b>  | <b>&lt;0.01</b>  | <b>2.59</b>  |
| HMOX1   | <b>0.36</b>  | <b>&lt;0.01</b>  | <b>-2.78</b> |
| IGFBP3  | 0.89         | N/A              | -1.13        |
| IGFBP5  | 1.60         | N/A              | 1.60         |
| IGFBP7  | 1.19         | N/A              | 1.19         |
| KDR     | 1.42         | N/A              | 1.42         |
| KRT14   | 0.52         | N/A              | -1.91        |
| LDHA    | 0.85         | N/A              | -1.18        |
| LIG4    | 1.19         | N/A              | 1.19         |
| LPL     | 1.42         | N/A              | 1.42         |
| MAP2K1  | 0.69         | N/A              | -1.45        |
| MAP2K3  | 1.07         | N/A              | 1.07         |
| MAPK14  | 1.36         | N/A              | 1.36         |
| MCM2    | <b>0.46</b>  | <b>&lt;0.01</b>  | <b>-2.15</b> |
| MKI67   | <b>0.48</b>  | <b>&lt;0.01</b>  | <b>-2.07</b> |
| NOL3    | 1.56         | N/A              | 1.56         |

|          |             |                 |              |
|----------|-------------|-----------------|--------------|
| OCLN     | 0.66        | N/A             | -1.51        |
| PFKL     | 1.06        | N/A             | 1.06         |
| PGF      | 0.69        | N/A             | -1.46        |
| PINX1    | 0.78        | N/A             | -1.28        |
| POLB     | 0.97        | N/A             | -1.03        |
| PPP1R15A | 0.74        | N/A             | -1.35        |
| SERPINB2 | <b>5.15</b> | <b>&lt;0.01</b> | <b>5.15</b>  |
| SERPINF1 | 1.38        | N/A             | 1.38         |
| SKP2     | 1.38        | N/A             | 1.38         |
| SLC2A1   | <b>2.09</b> | <b>&lt;0.05</b> | <b>2.09</b>  |
| SNAI1    | 0.80        | N/A             | -1.24        |
| SNAI2    | <b>5.23</b> | <b>&lt;0.01</b> | <b>5.23</b>  |
| SNAI3    | <b>2.49</b> | <b>&lt;0.01</b> | <b>2.49</b>  |
| SOD1     | 0.88        | N/A             | -1.14        |
| SOX10    | <b>2.10</b> | N/A             | <b>2.10</b>  |
| STMN1    | 0.56        | N/A             | -1.79        |
| TBX2     | 1.42        | N/A             | 1.42         |
| TEK      | <b>6.03</b> | <b>&lt;0.01</b> | <b>6.03</b>  |
| TEP1     | 1.90        | N/A             | 1.90         |
| TERF1    | 0.87        | N/A             | -1.15        |
| TERF2IP  | 0.78        | N/A             | -1.28        |
| TINF2    | 1.09        | N/A             | 1.09         |
| TNKS     | 1.24        | N/A             | 1.24         |
| TNKS2    | 0.77        | N/A             | -1.31        |
| UQCRFS1  | 0.70        | N/A             | -1.43        |
| VEGFC    | 1.35        | N/A             | 1.35         |
| WEE1     | 0.69        | N/A             | -1.46        |
| XIAP     | 1.12        | N/A             | 1.12         |
| ACTB     | 0.72        | N/A             | -1.38        |
| B2M      | 1.86        | N/A             | 1.86         |
| GAPDH    | 1.10        | N/A             | 1.10         |
| HPRT1    | <b>0.34</b> | <b>&lt;0.05</b> | <b>-2.98</b> |
| RPLP0    | 0.68        | N/A             | -1.47        |

**SUPPLEMENTARY TABLE 1** | With lent-pri-miR138-5p treatment or not, the mRNA expression levels of molecules related to growth and immune regulation in A549 tumor cells by cancer pathway Finder PCR array and showed in table.

Fold-change and fold-regulation values greater than 2 are indicated in red, indicating up-regulated gene; fold-change values less than 0.5 and fold-regulation values less than -2 are indicated in blue, indicating down-regulated gene. p-values: The p values are calculated based on a student's t-test of the replicate  $2^{(-\Delta Ct)}$  values for each gene in the control group and treatment groups, and p values less than 0.05 are indicated in red.
